# Supplementary material for: Assessing interannual variability in nitrogen sourcing and retention through hybrid Bayesian watershed modeling
Source: Copernicus journal article supplement (doi:10.5194/hess-25-2789-2021), 2021-05-26
Supplement: Supplementary file 1 [file hess-25-2789-2021-supplement.pdf]

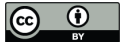

*Supplement of*

## **Assessing interannual variability in nitrogen sourcing and retention through hybrid Bayesian watershed modeling**

**Jonathan W. Miller et al.**

*Correspondence to:* Jonathan W. Miller ([jwmille7@ncsu.edu](mailto:jwmille7@ncsu.edu))

The copyright of individual parts of the supplement might differ from the article licence.

# FIGURES

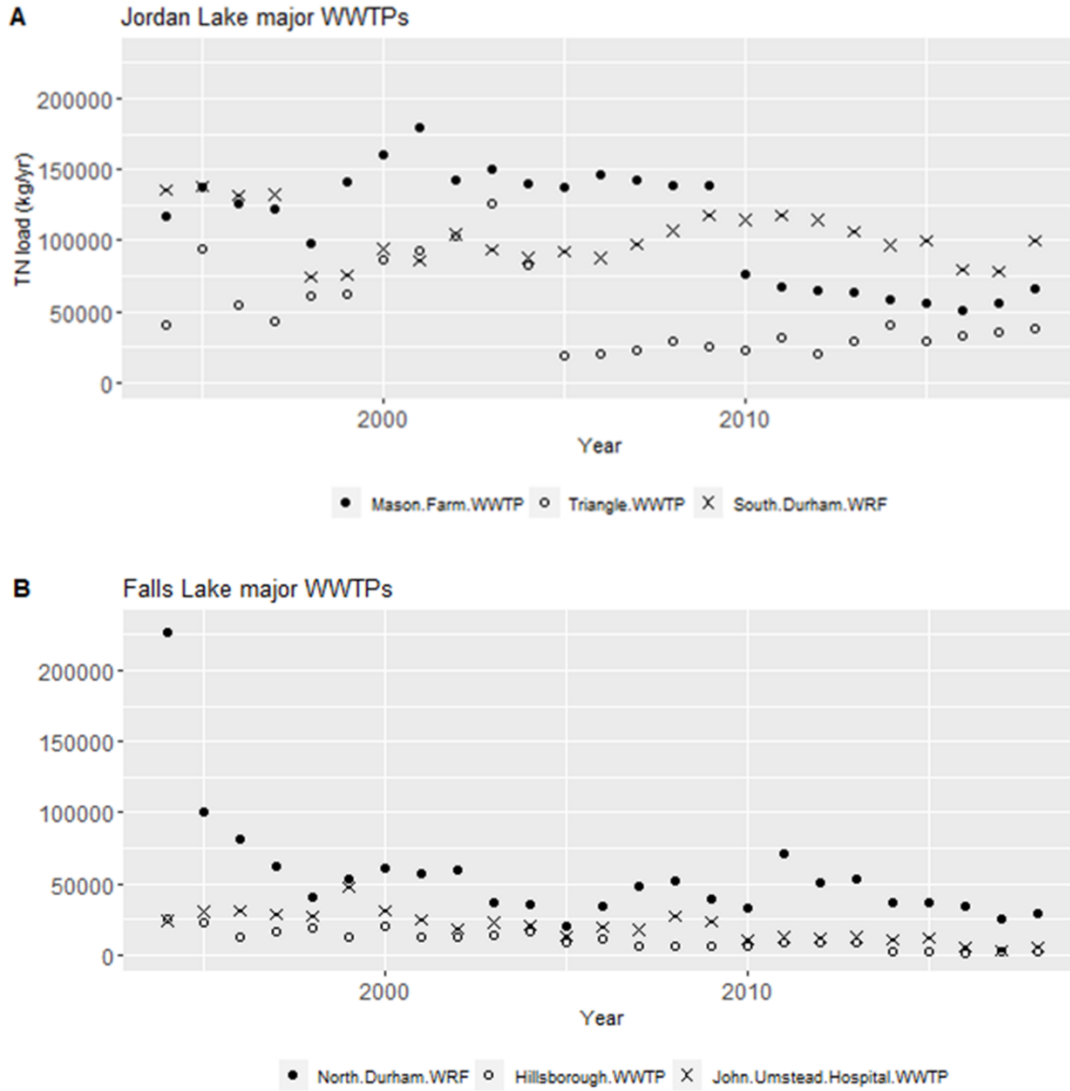

**Figure S1:** Yearly total nitrogen (TN) loadings from major wastewater treatment plants (WWTPs) located closest to (A) Jordan and (B) Falls Lake.

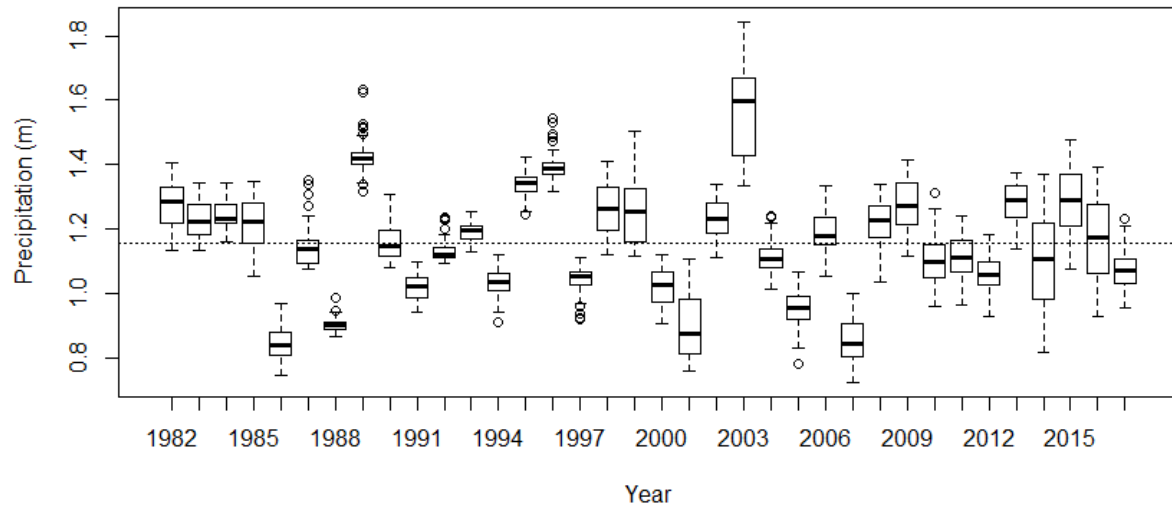

**Figure S2:** Box and whisker plots of yearly subwatershed precipitation. The horizontal dashed line represents mean yearly precipitation for the Jordan and Falls Lake watersheds.

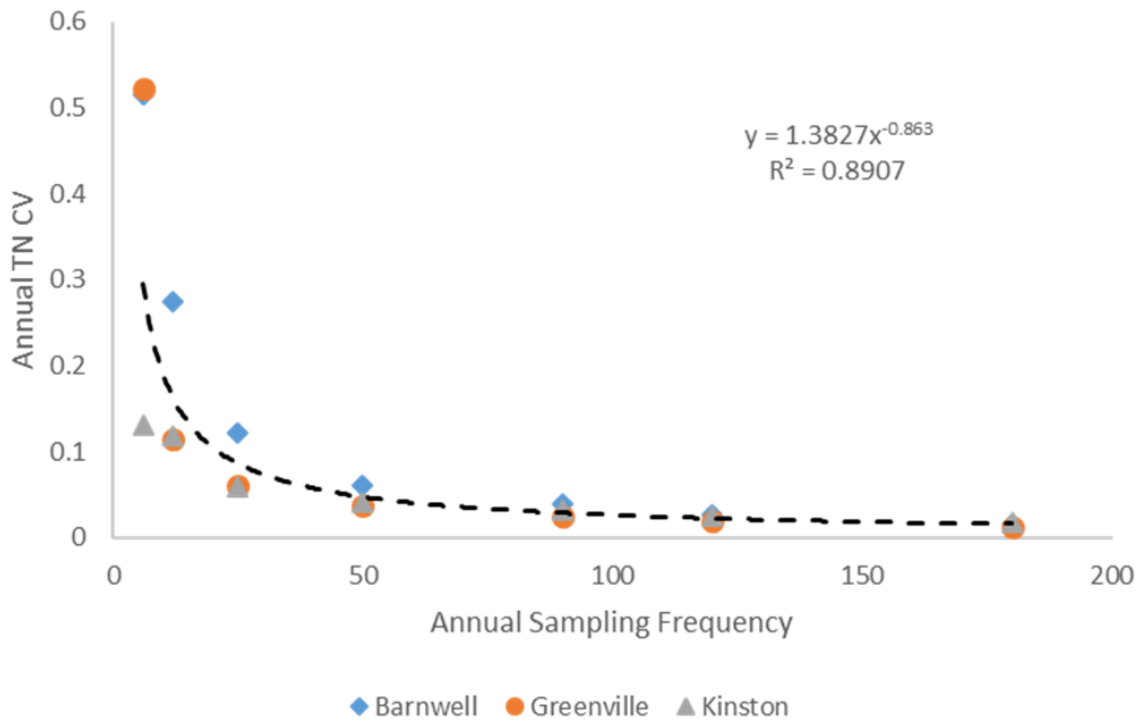

**Figure S3:** Power relationship (dashed line) quantifying the uncertainty (i.e., coefficient of variation (CV)) of total nitrogen (TN) yearly loadings based on the number of water quality samples available. Yearly loadings are based on Weighted Regression on Time Discharge and Season (WRTDS) estimates.

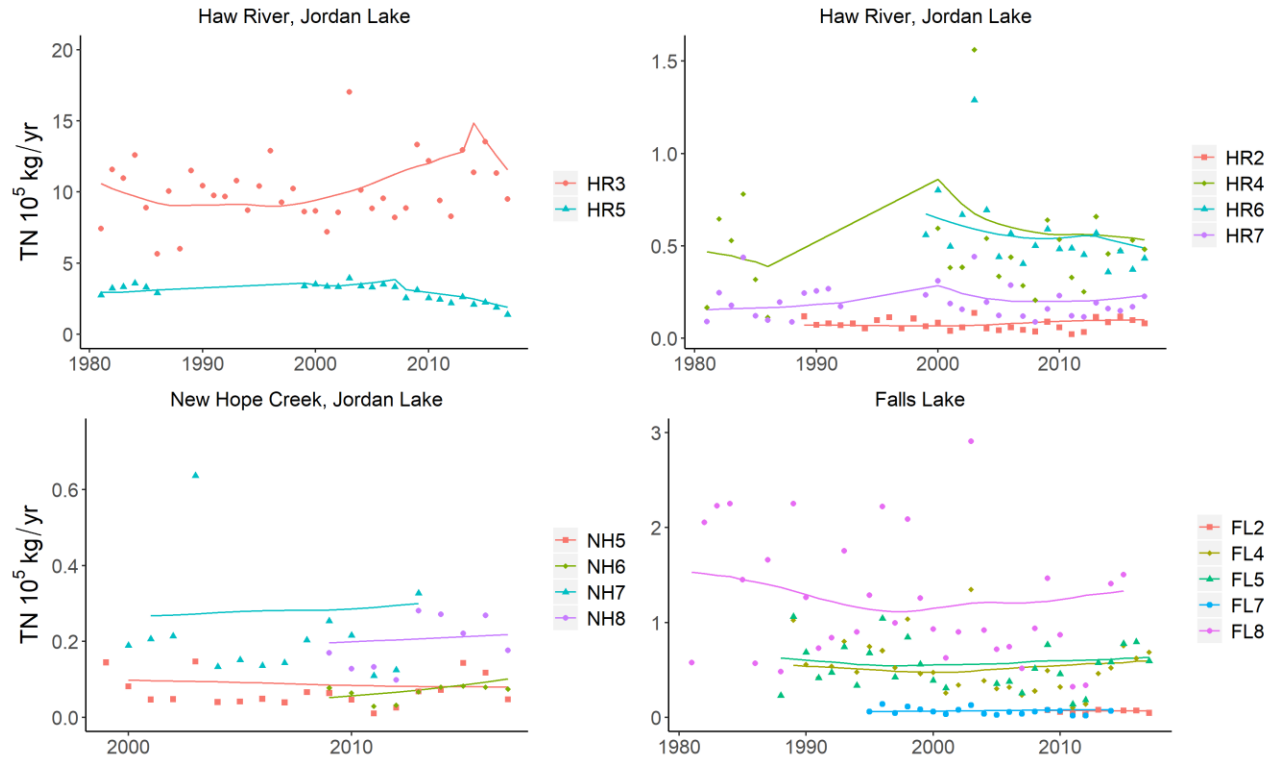

**Figure S4:** Weighted-regression on Time, Discharge and Season (WRTDS) annual TN loading estimates (points) and flow-normalized estimates (lines) for the Haw River (HR) and New Hope Creek (NH) basins of Jordan Lake (JL) and Falls Lake (FL). These LMSs are not shown in Figure 3.

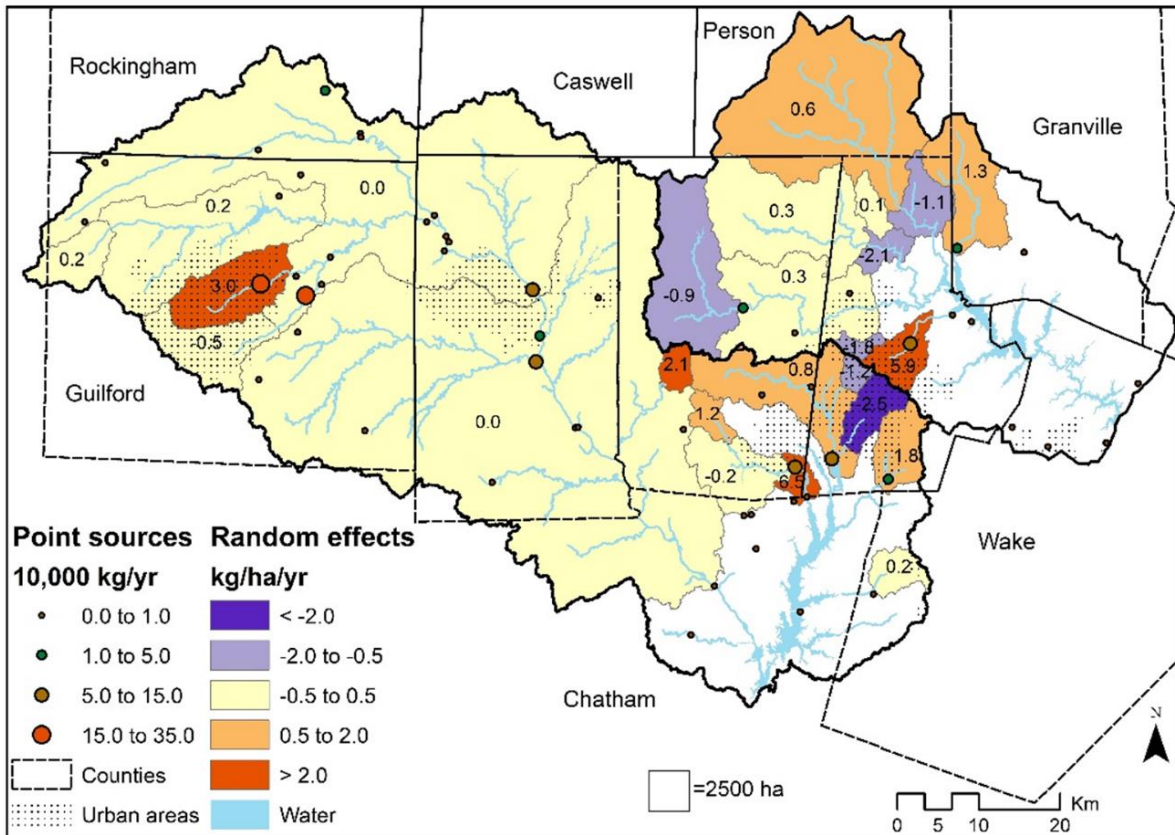

**Figure S5:** Area-normalized watershed-level random effects for each incremental watershed (i.e., load monitoring site (LMS) watershed). Point sources loads are shown separately as dots.

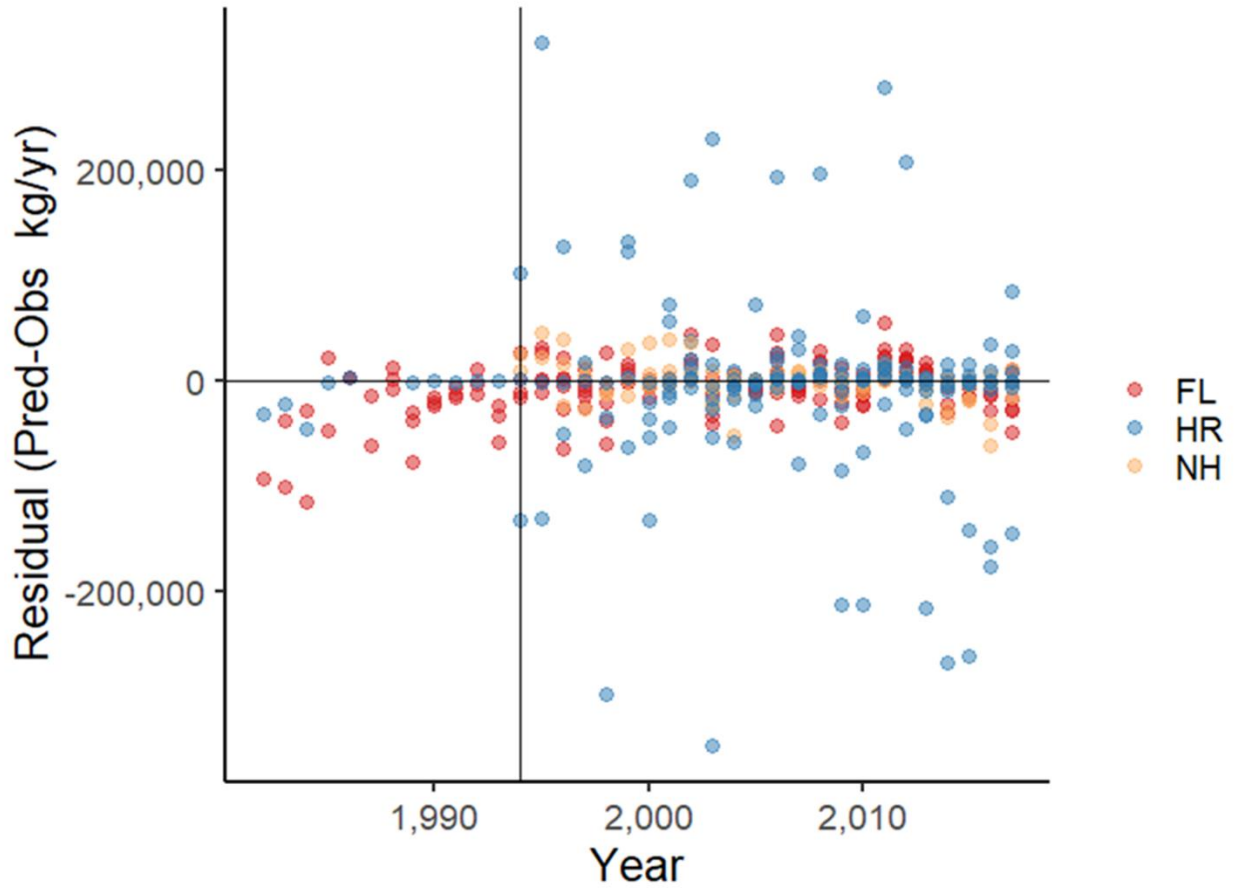

**Figure S6:** Model residuals plotted by year for the Haw River (HR) and New Hope (NH) watersheds of Jordan Lake and Falls Lake (FL). Load monitoring sites with major point source dischargers were not included before 1994 (solid vertical line).

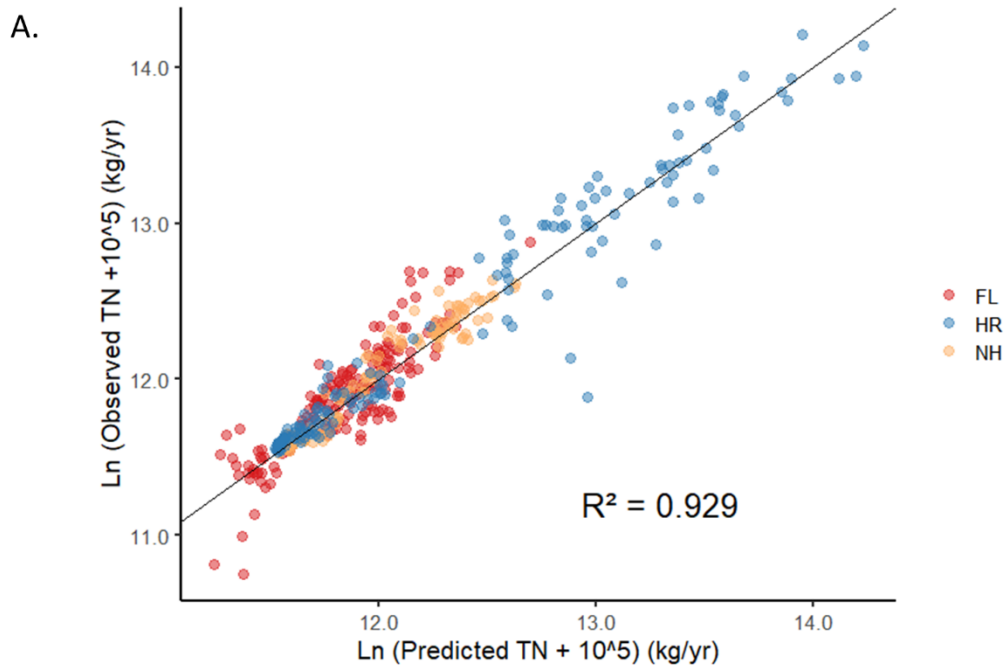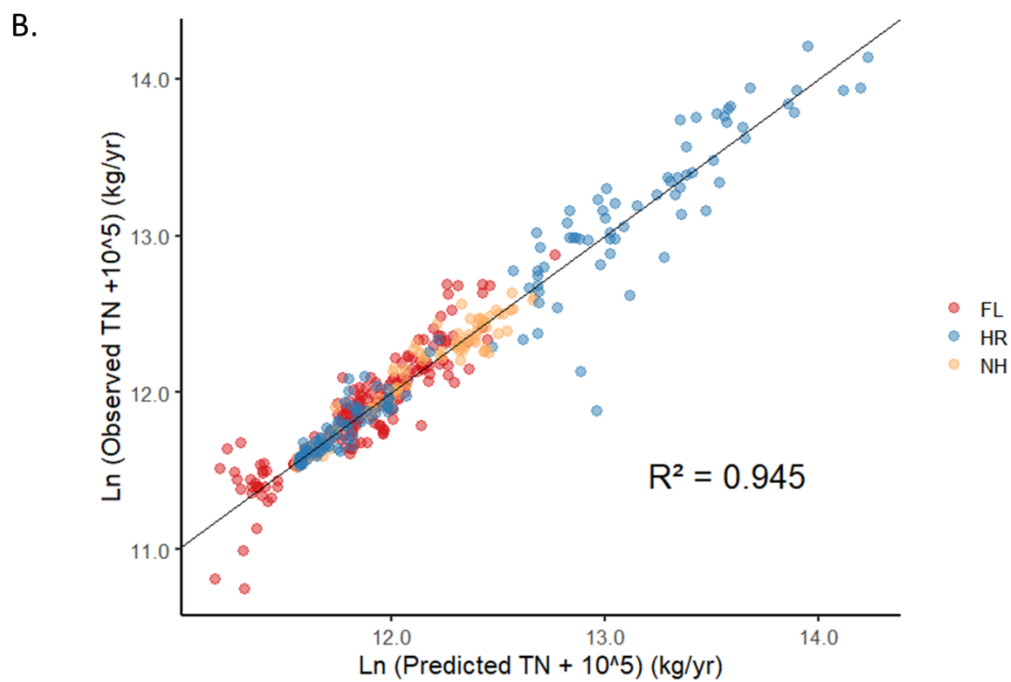

**Figure S7:** Observed vs. Predicted plots without (A) and with (B) watershed-level random effects for Haw River (HR) and New Hope (NH) watersheds of Jordan Lake and Falls Lake (FL).



## TABLES

**Table S1:** Point source total nitrogen (TN) loads, flows , residence times (RT), and hydraulic loading rates (HL) to downstream loading monitoring sites (LMSs) for major and minor wastewater treatment plants (WWTPs). Flows are shown in million gallons per day (MGD). Data comes from the North Carolina Department of Environmental Quality (NC DEQ).

| NC DEQ ID# | Name                               | TN load (kg) (2017) | Discharge (MGD) (2017) | Downstream LMS | Mean RT (days) to LS | Mean HL (m/yr) to LS |
|------------|------------------------------------|---------------------|------------------------|----------------|----------------------|----------------------|
| NC0026824  | John Umstead Hospital WWTP         | 3396                | 1.610                  | FL10           | 0.05                 |                      |
| NC0023841  | North Durham WRF                   | 25,765              | 8.280                  | FL1            | 0.24                 |                      |
| NC0026433  | Hillsborough WWTP                  | 2016                | 0.919                  | FL3            | 1.10                 |                      |
| NC0037869  | Arbor Hills Mobile Home Park       | 18                  | 0.001                  | FL3            | 0.55                 | 312.0                |
| NC0056731  | Grande Oak Subdivision WWTP        | 41                  | 0.002                  | FL3            | 0.20                 | 107.4                |
| NC0023876  | Southside WWTP                     | 43,342              | 5.872                  | HR1            | 1.26                 |                      |
| NC0021211  | Graham WWTP                        | 0                   | 0.000                  | HR1            | 1.30                 |                      |
| NC0021474  | Mebane WWTP                        | 6,177               | 1.269                  | HR1            | 1.76                 | 96.0                 |
| NC0035866  | Bynum WWTP                         | 122                 | 0.006                  | HR1            | 0.02                 |                      |
| NC0042285  | Trails WWTP                        | 485                 | 0.020                  | HR1            | 1.19                 |                      |
| NC0022675  | Birmingham Place                   | 0                   | 0.000                  | HR1            | 2.94                 |                      |
| NC0022098  | Cedar Valley WWTP                  | 126                 | 0.006                  | HR1            | 3.29                 |                      |
| NC0038164  | Nathanael Greene Elem. School WWTP | 0                   | 0.000                  | HR1            | 2.64                 |                      |
| NC0045128  | Sylvan Elementary School           | 172                 | 0.001                  | HR1            | 1.78                 |                      |
| NC0045152  | Jordan Elementary School           | 130                 | 0.002                  | HR1            | 1.08                 |                      |
| NC0042528  | B Everett Jordan 1927 LLC          | 123                 | 0.008                  | HR1            | 1.04                 |                      |
| NC0025241  | Mason Farm WWTP                    | 55,655              | 5.878                  | NH1            | 0.20                 |                      |
| NC0056413  | Carolina Meadows WWTP              | 2115                | 0.148                  | NH1            | 0.01                 |                      |
| NC0047597  | South Durham WRF                   | 78,164              | 8.023                  | NH2            | 0.55                 |                      |
| NC0042803  | Birchwood Mobile Home Park         | 102                 | 0.007                  | NH2            | 1.20                 |                      |
| NC0074446  | Hilltop Mobile Home Park           | 335                 | 0.010                  | NH2            | 1.54                 |                      |

|           |                                     |         |        |     |      |
|-----------|-------------------------------------|---------|--------|-----|------|
| NC0026051 | Triangle WWTP                       | 35,557  | 4.502  | NH3 | 0.14 |
| NC0023868 | Eastside WWTP                       | 55,515  | 3.883  | HR3 | 0.04 |
| NC0024881 | Reidsville WWTP                     | 48,902  | 2.280  | HR3 | 1.50 |
| NC0066966 | Quarterstone Farm WWTP              | 1,438   | 0.038  | HR3 | 1.28 |
| NC0046019 | The Summit WWTP                     | 0       | 0.000  | HR3 | 1.76 |
| NC0046809 | Pentecostal Holiness Church         | 19      | 0.000  | HR3 | 1.59 |
| NC0060259 | Willow Oak Mobile Home Park         | 164     | 0.008  | HR3 | 1.14 |
| NC0077968 | Horners Mobile Home Park            | 127     | 0.003  | HR3 | 0.52 |
| NC0045161 | Altamahaw/Ossipee Elementary School | 283     | 0.003  | HR3 | 0.50 |
| NC0045144 | Western Alamance High School        | 478     | 0.006  | HR3 | 0.40 |
| NC0031607 | Western Alamance Middle School      | 0       | 0.000  | HR3 | 0.45 |
| NC0055271 | Shields Mobile Home Park            | 0       | 0.000  | HR3 | 0.41 |
| NC0065412 | Pleasant Ridge WWTP                 | 40      | 0.008  | HR3 | 1.14 |
| NC0073571 | Countryside Manor WWTP              | 300     | 0.008  | HR3 | 2.78 |
| NC0046043 | Oak Ridge Military Academy          | 255     | 0.004  | HR3 | 2.74 |
| NC0022691 | Autumn Forest Manuf. Home Community | 160     | 0.018  | HR4 | 0.44 |
| NC0047384 | T.Z. Osborne WWTP                   | 582,529 | 27.680 | HR3 | 1.55 |
| NC0038172 | McLeansville Middle School WWTP     | 0       | 0.000  | HR3 | 1.55 |
| NC0029726 | Guilford Correctional Center WWTP   | 0       | 0.000  | HR3 | 1.53 |
| NC0024325 | North Buffalo Creek WWTP            | 161,171 | 6.619  | HR5 | 0.29 |

---

**Table S2:** Load monitoring sites (LMSs) where Weighted Regressions on Time, Discharge, and Season (WRTDS) estimates were calculated using a break (i.e. wall) in their record if a large sustained change (> 25% up or down) in an upstream point source load occurred.

| LMS | Name                  | Years of record |           | # of samples |      | Point source |                     |
|-----|-----------------------|-----------------|-----------|--------------|------|--------------|---------------------|
|     |                       | Pre             | Post      | Pre          | Post | Permit       | WWTP                |
| NH1 | Morgan Creek, JL      | 1994-2009       | 2010-2017 | 360          | 228  | NC0025241    | Mason Farm          |
| NH3 | Northeast Creek       | 1995-2004       | 2005-2017 | 108          | 322  | NC0026051    | Triangle            |
| HR3 | Haw River, Burlington | 1994-2013       | 2014-2017 | 223          | 56   | NC0047384    | T.Z. Osborne        |
| HR5 | N. Buffalo Creek      | 1999-2007       | 2008-2017 | 148          | 241  | NC0024325    | North Buffalo Creek |
| FL3 | Eno River, Durham     | 1994-2006       | 2007-2017 | 158          | 217  | NC0026433    | Hillsborough        |

**Table S3:** Prior distributions and hierarchical distributions for watershed model parameters. Note, EC is export coefficient, DC is delivery coefficient, PIC is precipitation impact coefficient, and SD is standard deviation. Priors are normal distributions (N) with mean and standard deviation or uniform distributions (U) with upper and lower bounds.

| Parameter         | Description          | Units           | Prior                            | Source                                       |
|-------------------|----------------------|-----------------|----------------------------------|----------------------------------------------|
| $\beta_{ag}$      | Agriculture EC       | kg/ha/yr        | N(9,7)                           | Dodd et al. 1992                             |
| $\beta_{ur1}$     | Urban type 1 EC      | kg/ha/yr        | N(8,3)                           | Dodd et al. 1992                             |
| $\beta_{ur2}$     | Urban type 2 EC      | kg/ha/yr        | N(8,3)                           | Dodd et al. 1992                             |
| $\beta_{und}$     | Undeveloped EC       | kg/ha/yr        | N(2,2)                           | Dodd et al. 1992                             |
| $\beta_{ch}$      | Chicken EC           | kg/an/yr        | N(0.001,0.0003)                  | Strickling and Obenour 2018                  |
| $\beta_h$         | Hog EC               | kg/an/yr        | N(0.04,0.02)                     | Strickling and Obenour 2018                  |
| $\beta_{cw}$      | Cow EC               | kg/an/yr        | U(0,5)                           | -                                            |
| $\beta_{ps}$      | Point source DC      | -               | N(1,0.10)                        | -                                            |
| $\gamma_{ag}$     | Agriculture PIC      | -               | N( $\mu_\gamma, \sigma_\gamma$ ) | -                                            |
| $\gamma_{ur1}$    | Urban type 1 PIC     | -               | N( $\mu_\gamma, \sigma_\gamma$ ) | -                                            |
| $\gamma_{ur2}$    | Urban type 2 PIC     | -               | N( $\mu_\gamma, \sigma_\gamma$ ) | -                                            |
| $\gamma_{und}$    | Undeveloped PIC      | -               | N( $\mu_\gamma, \sigma_\gamma$ ) | -                                            |
| $\gamma_{ch}$     | Chicken PIC          | -               | N( $\mu_\gamma, \sigma_\gamma$ ) | -                                            |
| $\gamma_{sw}$     | Swine PIC            | -               | N( $\mu_\gamma, \sigma_\gamma$ ) | -                                            |
| $\gamma_{cw}$     | Cow PIC              | -               | N( $\mu_\gamma, \sigma_\gamma$ ) | -                                            |
| $\gamma_{ret}$    | Retention rate PIC   | -               | N(0,1)                           | -                                            |
| $\kappa$          | Stream decay rate    | d <sup>-1</sup> | N(0.14,0.05)                     | Hoos and McHahon 2009,<br>Garcia et al. 2011 |
| $\omega$          | Reservoir loss rate  | m/yr            | N(11,2)                          | Hoos and McHahon 2009,<br>Garcia et al. 2011 |
| $\sigma_\epsilon$ | Model residual SD    | kg/yr           | U(0,1x10 <sup>6</sup> )          | -                                            |
| $\sigma_{LMS}$    | LMS random effect SD | kg/yr           | U(0,1x10 <sup>6</sup> )          | -                                            |
| $\mu_\gamma$      | PIC mean             | -               | N(1,1)                           | -                                            |
| $\sigma_\gamma$   | PIC SD               | -               | N(0,1)                           | -                                            |

**Table S4:** Percent of nutrient sources that contributes to downstream reservoirs for normal precipitation years (i.e., middle third of years based on precipitation). In parenthesis are nutrient source percentages during low (lower 33%) and high (upper 67%) precipitation years. Results are for the Haw River (HR) and New Hope (NH) watersheds of Jordan Lake and the Falls Lake (FL) watershed.

| Nutrient source  | % TN       |            |            |
|------------------|------------|------------|------------|
|                  | HR         | NH         | FL         |
| Agriculture      | 17 (11,25) | 1 (1,2)    | 30 (21,37) |
| Urban, pre-1980  | 18 (18,17) | 6 (6,5)    | 30 (34,25) |
| Urban, post-1980 | 2 (1,1)    | 2 (1,1)    | 5 (4,4)    |
| Undeveloped      | 6 (5,7)    | 2 (2,2)    | 19 (16,19) |
| Livestock        | 2 (2,2)    | 0 (0,0)    | 1 (2,2)    |
| Discharger       | 33 (40,28) | 11 (15,10) | 14 (24,13) |

### Text S1: RStan code used for pre and post-1980 model

```
data {
  int nl; //3600 subwatersheds separated by year
  int nr; //483 incremental watershed-years
  int nd; //985 dischargers associated with "nr"
  vector [nr] load; //WRTDS load at LMS
  vector [nr] SD; //SD calculated for WRTDS load
  vector [nl] chick; //chickens in subwatershed
  vector [nl] cow; //cow in subwatershed
  vector [nl] hog; //hogs (swine) in subwatershed
  int wsd [nr]; //count variable for LMSs
  int wshed_size; //# of LMS watersheds
  vector [nr] increm_area; //Incremental area for each loading station
  vector [nr] av_prec; //normalized precipitation
  vector [nr] av_prec2; //scaled precipitation
  vector [nr] up_t_load1; //upstream TN loading for nested wsds
  vector [nr] up_t_load2; //upstream TN loading for nested wsds
  vector [nr] up_t_load3; //upstream TN loading for nested wsds
  vector [nr] str_loss_load1; //stream losses of upstream TN loading
  vector [nr] str_loss_load2; //stream losses of upstream TN loading
  vector [nr] str_loss_load3; //stream losses of upstream TN loading
  vector [nr] res_loss_load1; //reservoir losses of upstream TN loading
  vector [nr] res_loss_load2; //reservoir losses of upstream TN loading
  vector [nr] res_loss_load3; //reservoir losses of upstream TN loading
  vector [nd] d_loss_str; //stream losses of dischargers to LMSs
  vector [nd] d_loss_res; //reservoir losses of dischargers to LMSs
  vector [nd] d_vals; //dischargers TN loadings
  vector [nl] l_loss_str; //stream losses for subwatersheds
  vector [nl] l_loss_res; //reservoir losses for subwatersheds
  vector [nl] ag; //agriculture in subwatershed
  vector [nl] devpre; //pre-1980 urban in subwatershed
  vector [nl] devpost; //post-1980 urban in subwatershed
  vector [nl] wild; //undeveloped in subwatershed
  vector [nl] tot_l; //total size of subwatershed
  int l_start [nr]; //count variables to link subwatersheds to LMSs
  int l_end [nr]; //count variables to link subwatersheds to LMSs
  int d_start [nr]; //count variables to link dischargers to LMSs
  int d_end [nr]; //count variables to link dischargers to LMSs
}

transformed data{
}

parameters {
  real<lower =0> Be_a; //Agriculture export
  real<lower =0> Be_d_pre; //pre-1980 developed export
  real<lower =0> Be_d_post; //post-1980 developed export
  real<lower =0> Be_w; //Undeveloped export
  real<lower =0, upper = 1> Be_ch; //Chickens export
  real<lower =0, upper = 1> Be_h; //Hogs (swine)
  real<lower =0, upper = 1> Be_cw; //Cows
  real <lower =0, upper = 1> Sn; //Stream retention
  real <lower =1, upper = 60> Sn2; //Reservoir retention
  real <lower =0, upper = 0.40> PIC_q; //PIC for stream flow
}
```

```

vector<lower = 0, upper = 10> [7] pic_p;           //PIC for land classes
real <lower=0> Be_dch;                             //Point source discharge coefficient
real<lower=0, upper = 2> sigma_res;               //Model residual sigma
real <lower=0, upper = 5> sigma_w;                //Random effect sigma
vector [wshed_size] alpha;                       //# of watersheds
real<lower = 0, upper = 2> sigma_B1;              //PIC sigma
real<lower = 0, upper = 3> Bp_mean;              //PIC mean
vector [nr] ly;                                  //log unknown true loads
}

transformed parameters {

}

model {
vector [nr] tot;                                  // Sum of all loadings from all sources
vector [nr] sigma;                               //sigma for watershed random effects
vector [nr] y_hat;                               //total loadings plus random effects minus waterbody losses
vector [nr] A;                                   //To compile Agriculture with PIC
vector [nr] Dpr;                                 //To compile pre-1980 urban with PIC
vector [nr] Dpt;                                 //To compile post-1980 urban with PIC
vector [nr] W;                                   //To compile undeveloped urban with PIC
vector [nr] Dch;                                 //To compile dischargers with stream/reservoir losses
vector [nr] tot_loss;
int w;
vector [nr] alpha_vals;                          // Watershed indicator
real t;

vector [nr] A;                                   //Agriculture vector
vector [nr] D_lc_pre;                            //pre-1980 vector
vector [nr] D_lc_post;                           //post-1980 vector
vector [nr] W_lc;                                //Undeveloped vector
vector [nr] Disch;                               //point source dischargers
vector [nr] C;                                   //chickens for adding PIC
vector [nr] H;                                   //hogs for adding PIC
vector [nr] Cw;                                   //cows for adding PIC
vector [nr] C_r;                                 //chickens for aggregating subwatersheds
vector [nr] H_r;                                 //swine for aggregating subwatersheds
vector [nr] Cw_r;                                //cows for aggregating subwatersheds

vector [nr] ly_hat;                              // log of TN load with transformation and offset
vector [nr] y;                                   //TN load

// Loop to determine export for each watershed-year
for(i in 1:nr){

//Looping to aggregate subwatersheds and corresponding stream and reservoir retention.
A_lc[i]= sum((ag[l_start[i]:l_end[i]]) .* (exp((-Sn/(1+PIC_q*av_prec[i])) *
l_loss_str[l_start[i]:l_end[i]])) .* (exp((-Sn2/(1+PIC_q*av_prec[i])) ./l_loss_res[l_start[i]:l_end[i]])));
D_lc_pre[i]= sum((devpre[l_start[i]:l_end[i]]) .* (exp((-Sn/(1+PIC_q*av_prec[i])) *
l_loss_str[l_start[i]:l_end[i]])) .* (exp((-Sn2/(1+PIC_q*av_prec[i])) ./l_loss_res[l_start[i]:l_end[i]])));
D_lc_post[i]= sum((devpost[l_start[i]:l_end[i]]) .* (exp((-Sn/(1+PIC_q*av_prec[i])) *
l_loss_str[l_start[i]:l_end[i]])) .* (exp((-Sn2/(1+PIC_q*av_prec[i])) ./l_loss_res[l_start[i]:l_end[i]])));
W_lc[i]= sum((wild[l_start[i]:l_end[i]]) .* (exp((-Sn/(1+PIC_q*av_prec[i])) *
l_loss_str[l_start[i]:l_end[i]])) .* (exp((-Sn2/(1+PIC_q*av_prec[i])) ./l_loss_res[l_start[i]:l_end[i]])));
}

```

```

Disch[i]=sum((d_vals[d_start[i]:d_end[i]]).*exp((-Sn/(1+PIC_q*av_prec[i]))*
d_loss_str[d_start[i]:d_end[i]]).*exp((-Sn2/(1+PIC_q*av_prec[i]))./
d_loss_res[d_start[i]:d_end[i]]));
C_r[i]=sum((chick[l_start[i]:l_end[i]]).*exp((-Sn/(1+PIC_q*av_prec[i]))*
l_loss_str[l_start[i]:l_end[i]]).*exp((-Sn2/(1+PIC_q*av_prec[i]))./l_loss_res[l_start[i]:l_end[i]]));
H_r[i]=sum((hog[l_start[i]:l_end[i]]).*exp((-Sn/(1+PIC_q*av_prec[i]))*
l_loss_str[l_start[i]:l_end[i]]).*exp((-Sn2/(1+PIC_q*av_prec[i]))./l_loss_res[l_start[i]:l_end[i]]));
Cw_r[i]=sum((cow[l_start[i]:l_end[i]]).*exp((-Sn/(1+PIC_q*av_prec[i]))*
l_loss_str[l_start[i]:l_end[i]]).*exp((-Sn2/(1+PIC_q*av_prec[i]))./l_loss_res[l_start[i]:l_end[i]]));

//Adding precipitation impact coefficient to land export
A[i]= Be_a * pow(av_prec2[i],pic_p[1]) * A_lc[i];
Dpr[i] = Be_d_pre * pow(av_prec2[i],pic_p[2]) * D_lc_pre[i];
Dpt[i] = Be_d_post * pow(av_prec2[i],pic_p[3]) * D_lc_post[i];
D[i] = Dpr[i]+Dpt[i];
W[i] = Be_w * pow(av_prec2[i],pic_p[4]) * W_lc[i];
C[i] = Be_ch * pow(av_prec2[i],pic_p[5]) * C_r[i];
H[i] = Be_h * pow(av_prec2[i],pic_p[6]) * H_r[i];
Cw[i] = Be_cw * pow(av_prec2[i],pic_p[7]) * Cw_r[i];
Dch[i] = Be_dch * Disch[i];
}

//Loop to determine random effect for each watershed
for (i in 1:nr){
  w= wsd[i];
  sigma[i] = sqrt(pow(SD[i],2)+pow(sigma_res,2)); //with regular sigma values
  alpha_vals[i] = alpha[w];
}

//Sum loadings from all sources
tot = A + D + W + C + H + Cw + Dch;

//Add random effects to source loadings and subtract losses from upstream loads
y_hat = tot + 10000 * alpha_vals - up_t_load1 .* (1-(exp((-Sn ./ (1+PIC_q*av_prec)) .* str_loss_load1) .* exp((-Sn2
./ (1+PIC_q*av_prec)) ./ res_loss_load1))) - up_t_load2 .* (1-(exp((-Sn ./ (1+PIC_q*av_prec)) .* str_loss_load2) .*
exp((-Sn2 ./ (1+PIC_q*av_prec)) ./ res_loss_load2))) - up_t_load3 .* (1-(exp((-Sn ./ (1+PIC_q*av_prec)) .*
str_loss_load3) .* exp((-Sn2 ./ (1+PIC_q*av_prec)) ./ res_loss_load3)));

//Priors for the model
Be_a ~ normal(900,700); //Prior for agriculture, TN/km2/yr
Be_d_pre ~ normal(800,300); //Prior for pre-1980 development, TN/km2/yr
Be_d_post ~ normal(800,300); //Prior for post-1980 development, TN/km2/yr
Be_w ~ normal(200,200); //Prior for undeveloped, TN/km2/yr
Be_ch ~ normal(0.001,0.0003); //Prior for chickens (TN/count)
Be_h ~ normal(0.04,0.02); //Prior for swine (TN/count)
Be_cw ~ normal(0,5); //Uninformed Prior for cow
Be_dch ~ normal(1,10); //Prior for point source delivery, unitless
sigma_res ~ normal(0,20); //st error of the model
sigma_w ~ normal(0,300); //st. deviation of random effect hyperdistribution
alpha ~ normal(0,sigma_w); //watershed random effects
sigma_B1 ~ normal(0,1); //st. deviation for PIC hyperdistribution
Bp_mean ~ normal(1,1); //mean for PIC hyperdistribution
pic_p[1] ~ normal(Bp_mean,sigma_B1); //PIC ag distribution
pic_p[2] ~ normal(Bp_mean,sigma_B1); //PIC pre distribution
pic_p[3] ~ normal(Bp_mean,sigma_B1); //PIC post distribution
pic_p[4] ~ normal(Bp_mean,sigma_B1); //PIC undeveloped distribution

```



```

pic_p[5] ~ normal(Bp_mean,sigma_B1);           //PIC chicken distribution
pic_p[6] ~ normal(Bp_mean,sigma_B1);           //PIC hog distribution
pic_p[7] ~ normal(Bp_mean,sigma_B1);           //PIC cow distribution
Sn ~ normal(.14,.05);                           //Prior for stream retention rate, 1/d
Sn2 ~ normal(11,2);                             //Prior for waterbody retention rate, m/y
PIC_q ~ normal(0,1);                             //PIC for retention

// with log transformation
ly_hat=log((y_hat ./10000) + 10);               // vector to get log of TN load (y_hat)
ly ~ normal(ly_hat,sigma_res);                 //parameter that calibrates ly_hat (log of TN load) with ly ()
y=exp(ly)-10;                                  // parameter that calibrates to load
load ~ normal(y,SD);                           // load = WRTDS estimate, SD = WRTDS sd
}

```
